# Supplementary material for: An ultra-sensitive and recyclable FET-type toxic gas sensor based on WTe2 monolayers
Source: Royal Society of Chemistry journal article supplement (doi:10.1039/d4ta02739f), 2024-01-01
Supplement: d4ta02739f1.pdf [file d4ta02739f1.pdf]

Supporting information for  
**An Ultra-Sensitive and Recyclable FET-Type Toxic Gas Sensor  
Based on WTe<sub>2</sub> Monolayer**

Mi-Mi Dong<sup>1,2</sup>, Hang He<sup>2</sup>, Ming-Wen Zhao<sup>1\*</sup>, Chuan-Kui Wang<sup>2\*</sup>, Xiao-Xiao Fu<sup>2\*</sup>

<sup>1</sup> School of Physics, Shandong University, Jinan, 250100, China

<sup>2</sup> Shandong Key Laboratory of Medical Physics and Image Processing & Shandong Provincial Engineering and Technical Center of Light Manipulations, School of Physics and Electronics, Shandong Normal University, Jinan, 250358, China

\*E-mail: zmw@sdu.edu.cn; ckwang@sdu.edu.cn; fuxiaoxiao@sdu.edu.cn

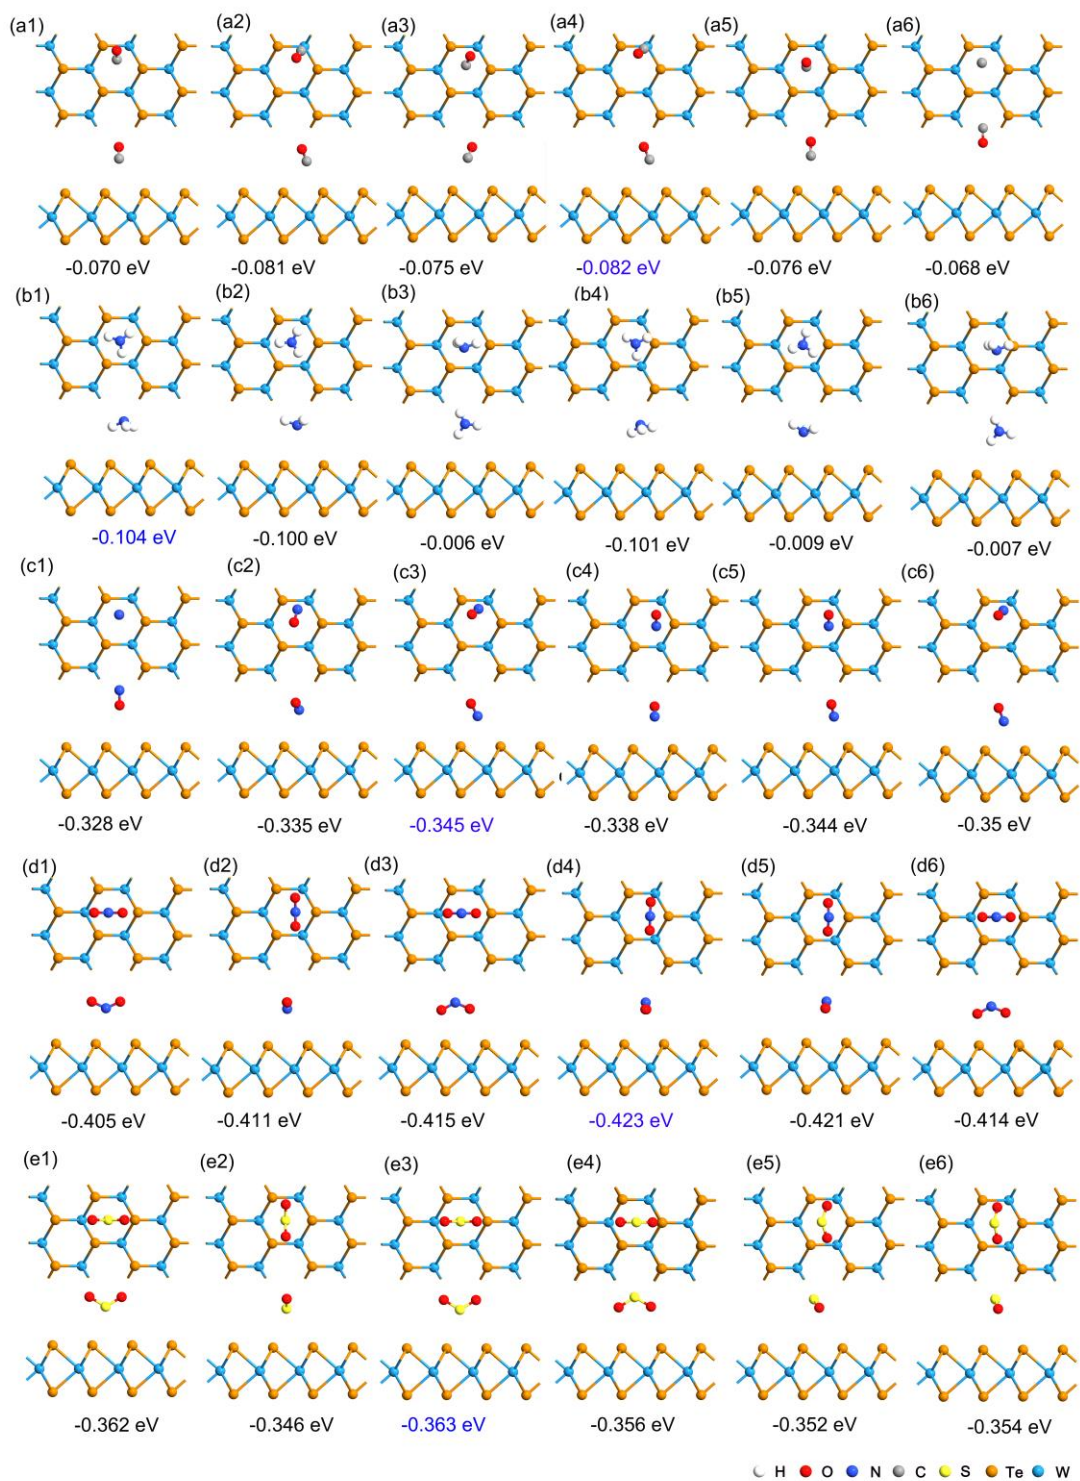

Fig. S1 Possible adsorption configurations and corresponding adsorption energies of the gas molecules adsorbed on the pure WTe<sub>2</sub> monolayer. The adsorption energy marked by blue color corresponds to the most stable adsorption configuration.

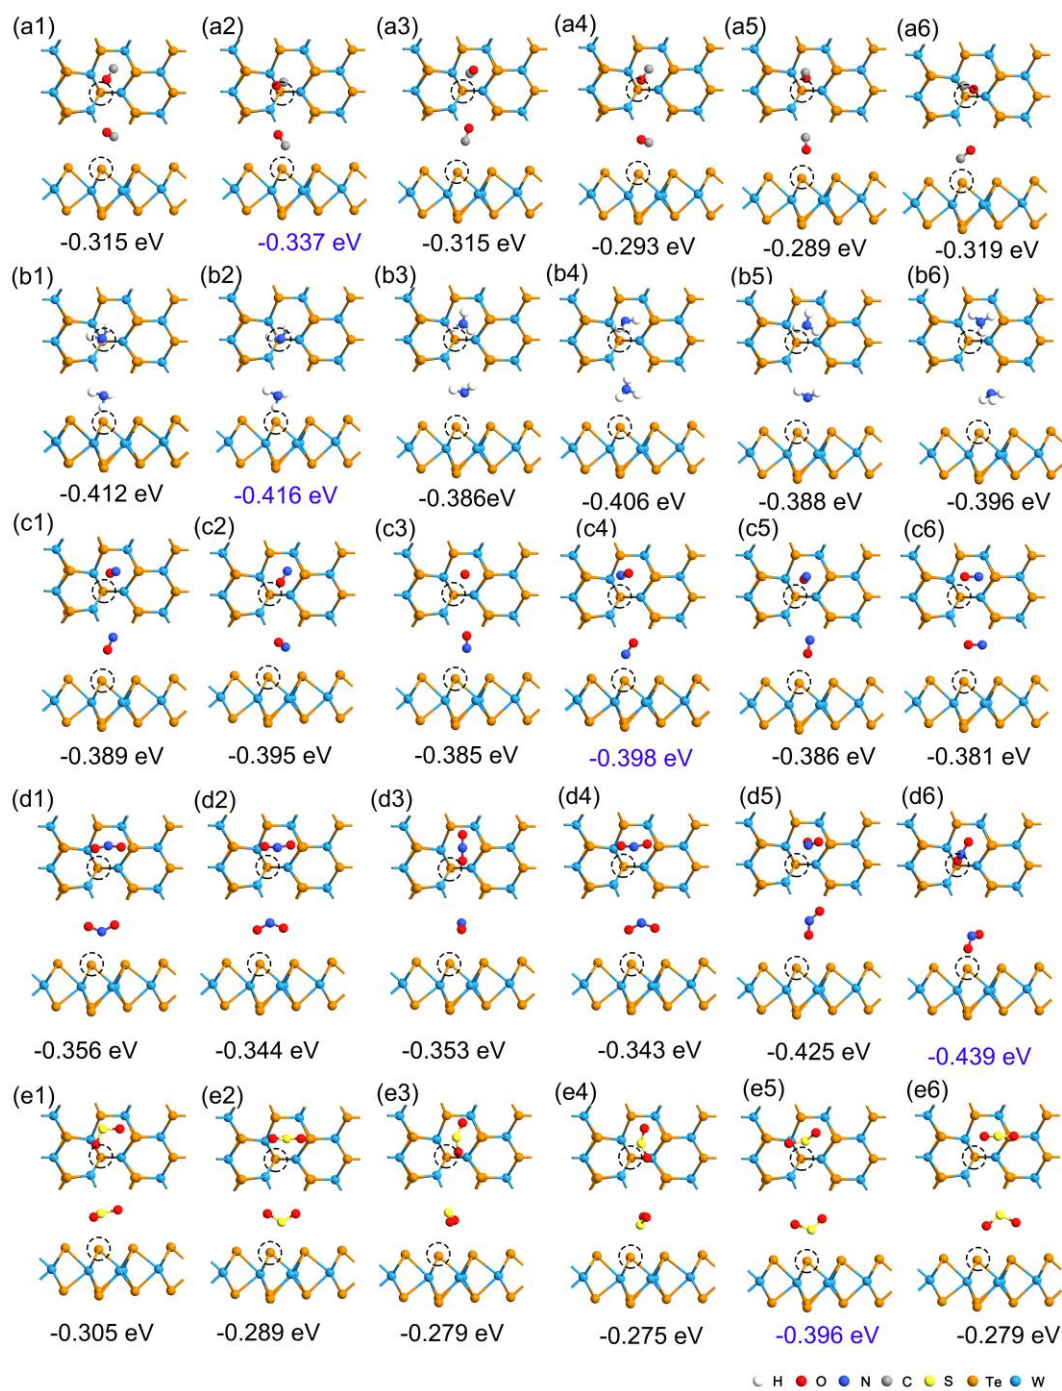

Fig. S2 Possible adsorption configurations and corresponding adsorption energies of the gas molecules adsorbed on the defective  $WTe_2$  monolayer. The adsorption energy marked by blue color corresponds to the most stable adsorption configuration. The circles marked by black dashed lines mean the Te vacancies.

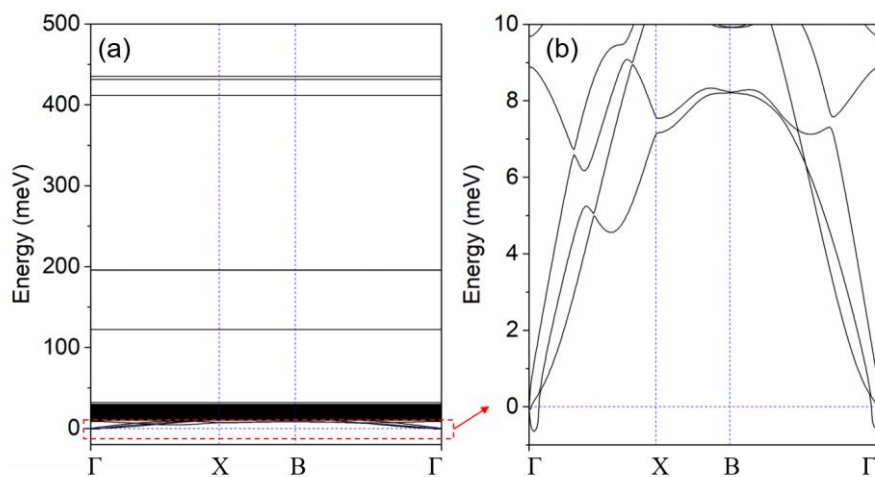

Fig. S3 (a) The phonon spectra of NO<sub>2</sub>-defective WTe<sub>2</sub> adsorption system. (b) The phonon spectra of NO<sub>2</sub>-defective WTe<sub>2</sub> adsorption system around the Fermi level.

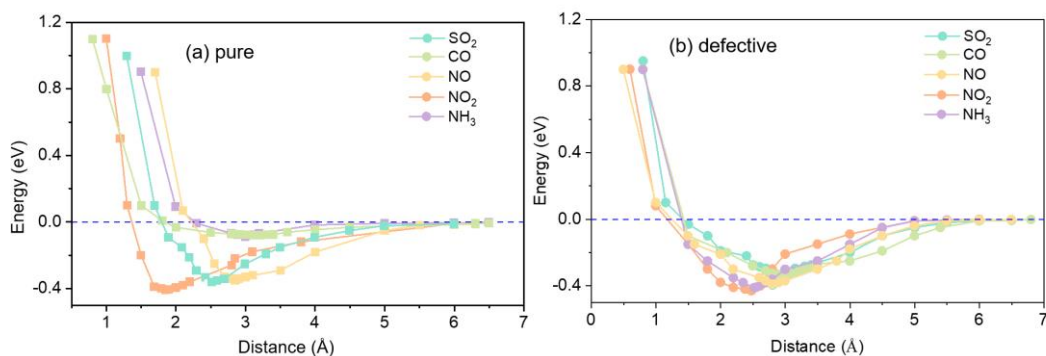

Fig. S4 The Morse potential as function of the distance of the (a) pure WTe<sub>2</sub> and (b) defective WTe<sub>2</sub> adsorption systems.

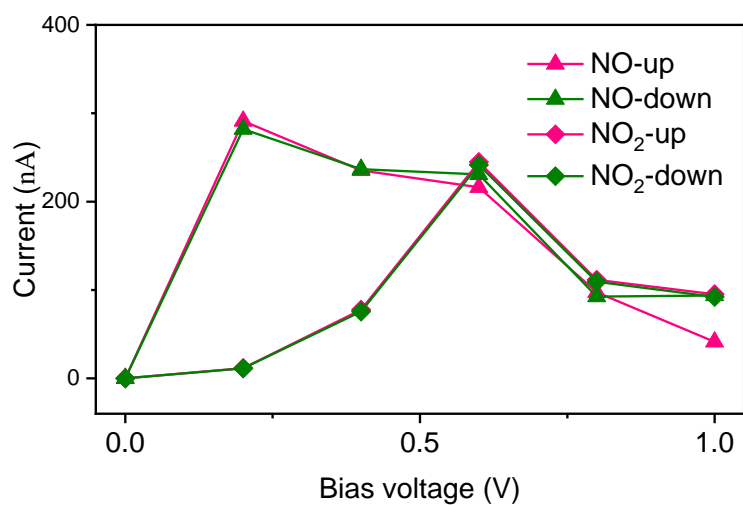

Fig. S5 The spin-resolved current of the NO and NO<sub>2</sub> adsorbed pure WTe<sub>2</sub> FET-type gas sensors.
